# Supplementary material for: Modeling Climate Regulation of Arable Soils in Northern Saxony under the Influence of Climate Change and Management Practices
Source: MDPI journal article supplement (doi:10.3390/su151411128), 2023-07-17
Supplement: s1 [file s1]

Table S1: Overview of yield per crop group from 2016-2019.

| crop group          | assigned crops<br>(German original class names)                                               | average yield per year in dt ha <sup>-1</sup> |                  |                  |                  | source                                                                              |
|---------------------|-----------------------------------------------------------------------------------------------|-----------------------------------------------|------------------|------------------|------------------|-------------------------------------------------------------------------------------|
|                     |                                                                                               | year 1<br>(2016)                              | year 2<br>(2017) | year 3<br>(2017) | year 4<br>(2019) |                                                                                     |
| permanent grassland | Wiesen                                                                                        | 59.40                                         | 64.90            | 29.70            | 40.30            | [43–46]                                                                             |
|                     | Mähweiden                                                                                     | 59.00                                         | 66.00            | 27.80            | 35.50            | Data available for Northern Saxony                                                  |
|                     | Weiden und Almen                                                                              | 59.00                                         | 66.00            | 27.80            | 35.50            |                                                                                     |
|                     | Hutungen                                                                                      | 59.20                                         | 65.45            | 28.75            | 37.90            | Average value of „Wiesen“ (meadow/<br>grassland) and „Mähweiden“ (mowing<br>meadow) |
|                     | Streuobstfläche mit Grünlandnutzung                                                           | 59.20                                         | 65.45            | 28.75            | 37.90            |                                                                                     |
|                     | Nicht DZ-beihilfefähige Hutungen                                                              | 59.20                                         | 65.45            | 28.75            | 37.90            |                                                                                     |
|                     | Stilllegung für Naturschutz und<br>Landschaftspflege (5-Jahresprogramm)<br>(auf GL)           | 59.20                                         | 65.45            | 28.75            | 37.90            |                                                                                     |
|                     | nach Art. 22 bis 24 der VO (EG) Nr.<br>1257/99 stillgelegte Dauergrünlandfläche               | 59.20                                         | 65.45            | 28.75            | 37.90            |                                                                                     |
|                     | Dauergrünland aus der Erzeugung<br>genommen iSd. Art. 4 Abs. 1 Buchst. c) ii)<br>VO 1307/2013 | 59.20                                         | 65.45            | 28.75            | 37.90            |                                                                                     |
|                     | Grünland ohne landw. Nutzung                                                                  | 59.20                                         | 65.45            | 28.75            | 37.90            |                                                                                     |
| Set-aside           | Vorübergehende, unbefestigte Mieten,<br>Stroh-, Futter- oder Dunglagerplätze auf<br>DGL       | 59.20                                         | 65.45            | 28.75            | 37.90            | average value based on data in [50, 51]                                             |
|                     | Stilllegung für Naturschutz und<br>Landschaftspflege (5-Jahresprogramm)<br>(auf AL)           | 100.0                                         | 100.0            | 100.0            | 100.0            |                                                                                     |
|                     | nach Art. 22 bis 24 der VO (EG) Nr.<br>1257/99 stillgelegte Ackerfläche                       | 100.0                                         | 100.0            | 100.0            | 100.0            |                                                                                     |
|                     | Blühfläche (MSL-Maßnahme)                                                                     | 100.0                                         | 100.0            | 100.0            | 100.0            |                                                                                     |
|                     | Brache mit Einsaat von einjährigen<br>Blühmischungen                                          | 100.0                                         | 100.0            | 100.0            | 100.0            |                                                                                     |
|                     | Ackerland aus der Erzeugung genommen<br>iSd. Art. 4 Abs. 1 Buchst. c) ii) VO<br>1307/2013     | 100.0                                         | 100.0            | 100.0            | 100.0            |                                                                                     |
|                     | Bienenweide pollen- und nektarreiche<br>Arten - einjährig                                     | 100.0                                         | 100.0            | 100.0            | 100.0            |                                                                                     |
|                     | Bienenweide pollen- und nektarreiche<br>Arten - mehrjährig                                    | 100.0                                         | 100.0            | 100.0            | 100.0            |                                                                                     |
| Wheat               | Winter-Emmer/ -Einkorn                                                                        | 81.20                                         | 75.10            | 65.40            | 70.70            | [43–46]                                                                             |
|                     | Winterhartweizen/Durum                                                                        | 55.20                                         | 50.70            | 41.00            | 52.50            | Data available for Saxony                                                           |
|                     | Sommerhartweizen/Durum                                                                        | 55.20                                         | 50.70            | 41.00            | 52.50            |                                                                                     |
|                     | Sommerweichweizen                                                                             | 52.10                                         | 54.10            | 39.30            | 45.60            |                                                                                     |
|                     | Winterweichweizen                                                                             | 81.20                                         | 75.10            | 65.40            | 70.70            |                                                                                     |
| Sugar beets         | Zuckerrüben                                                                                   | 639.9                                         | 773,7            | 424,9            | 555,5            | [43–46]<br>Data available for Northern Saxony                                       |
| Barley              | Wintergerste                                                                                  | 79.20                                         | 70,10            | 58,00            | 64,80            |                                                                                     |
|                     | Sommergerste                                                                                  | 56.30                                         | 49,20            | 23,20            | 44,40            |                                                                                     |
| Maize               | Silomais (als Hauptfutter)                                                                    | 377.4                                         | 430,2            | 211,0            | 256,50           |                                                                                     |
|                     | Mais (ohne Silomais)                                                                          | 79.60                                         | 91,50            | 46,20            | 55,70            |                                                                                     |
| Rapeseed            | Winterraps                                                                                    | 37.50                                         | 32.80            | 26.90            | 29.20            |                                                                                     |
|                     | Sudangras                                                                                     | 468.0                                         | 443.0            | 286.0            | 338.5            |                                                                                     |
|                     | Ackergras                                                                                     | 468.0                                         | 443.0            | 286.0            | 338.5            |                                                                                     |

|                               |                                                                                             |            |            |            |        |                                                                                                |
|-------------------------------|---------------------------------------------------------------------------------------------|------------|------------|------------|--------|------------------------------------------------------------------------------------------------|
| <b>Grass and clover</b>       | Kleegras                                                                                    | 447.5      | 412.0      | 284.0      | 314.5  | Calculation for Freshmatter: multiplied with factor 5 based on [47], For control purpose: [48] |
|                               | Klee-Luzerne-Gemisch                                                                        | 447.5      | 412.0      | 284.0      | 314.5  |                                                                                                |
|                               | Rot-/Weiß-/Alexandrinier-/Inkarnat-/Erd-/Schweden-/Persischer Klee                          | 447.5      | 412.0      | 284.0      | 314.5  |                                                                                                |
|                               | Luzerne, Hopfenklee/Gelbklee, Bastardluzerne/Sandluzerne                                    | 447.5      | 412.0      | 284.0      | 314.5  |                                                                                                |
|                               | Luzerne-Gras                                                                                | 447.5      | 412.0      | 284.0      | 314.5  |                                                                                                |
| <b>Triticale</b>              | Wintertriticale                                                                             | 57.10      | 51.4       | 34.40      | 44.70  | [43–46]                                                                                        |
|                               | Sommertriticale                                                                             | 57.10      | 51.4       | 34.40      | 44.70  | Data available for Northern Saxony                                                             |
| <b>Oats</b>                   | Winterhafer                                                                                 | 47.60      | 44.60      | 25.90      | 32.30  |                                                                                                |
|                               | Sommerhafer                                                                                 | 47.60      | 44.60      | 25.90      | 32.30  |                                                                                                |
| <b>Rye</b>                    | Winterroggen                                                                                | 58.90      | 50.90      | 47.40      | 53.30  |                                                                                                |
|                               | Winterroggen, Winter-Waldstaudenroggen                                                      | 58.90      | 50.90      | 47.40      | 53.30  |                                                                                                |
|                               | Sommerroggen                                                                                | 58.90      | 50.90      | 47.40      | 53.30  |                                                                                                |
|                               | Sommerroggen, Sommer-Waldstaudenroggen                                                      | 58.90      | 50.90      | 47.40      | 53.30  |                                                                                                |
| <b>other arable crops</b>     | Gemenge Leguminosen / Getreide                                                              | 89.50      | 82.40      | 56.80      | 62.90  |                                                                                                |
|                               | Sonnenblumen                                                                                | 23.80      | 24.70      | 14.90      | 16.30  | [43–46], Data available for Saxony;                                                            |
|                               | Sojabohnen                                                                                  | 24.30      | 31.20      | 8.40       | 18.40  | Calculation of dt/ha for vegetables:                                                           |
|                               | Gemüse                                                                                      | 134.8      | 142.6<br>4 | 84.06      | 101.98 | "Gemüse insgesamt"/ Anbaufläche insgesamt                                                      |
|                               | Weißer Senf, Gelber Senf                                                                    | 40.00      | 40.00      | 40.00      | 40.00  | [49]                                                                                           |
|                               | Gemüse-Kürbisgewächse                                                                       | 174.2      | 179.3      | 141.7      | 162.70 | [43–46]                                                                                        |
|                               | Möhre (Möhre/Karotte, Futtermöhre)                                                          | 420.0      | 540.9      | 351.0      | 300.20 | Data available for Saxony                                                                      |
|                               | Vorübergehende, unbefestigte Mieten, Stroh-, Futter oder Dunglagerplätze (AL)               | 59.20      | 65.45      | 28.75      | 37.90  | see permanent grassland                                                                        |
| <b>Legumes</b>                | Körnererbsen                                                                                | 35.01      | 35.69      | 22.4       | 21.42  | [43–46]                                                                                        |
|                               | Gemüseerbse                                                                                 | 35.01      | 35.69      | 22.40      | 21.42  | Data available for Northern Saxony                                                             |
|                               | Ackerbohne/Puffbohne/Pferdebohne/Dicke Bohne                                                | 35.01      | 35.69      | 22.40      | 21.42  | Calculation: weighted average of the values of "Erbsen" and „Ackerbohnen“                      |
|                               | Wicken D                                                                                    | 35.01      | 35.69      | 22.40      | 21.42  |                                                                                                |
|                               | Lupinen (Süßlupine, weiße Lupine, blaue/schmalblättrige Lupine, gelbe Lupine, Anden-Lupine) | 35.01      | 35.69      | 22.40      | 21.42  |                                                                                                |
|                               | Erbsen/Bohnen                                                                               | 35.01      | 35.69      | 22.40      | 21.42  |                                                                                                |
|                               | Serradella (auch Vermehrung)                                                                | 35.01      | 35.69      | 22.40      | 21.42  |                                                                                                |
|                               |                                                                                             |            |            |            |        |                                                                                                |
| <b>Potatoes</b>               | Stärkekartoffeln                                                                            | 389.3      | 422.9      | 235.6      | 319.1  | [43–46]                                                                                        |
|                               | Kartoffeln                                                                                  | 389.3      | 422.9      | 235.6      | 319.1  | Data available for Northern Saxony                                                             |
|                               | Gemüse-Nachtschattengewächse                                                                | 775.0<br>0 | 830.0<br>0 | 620.0<br>0 | 560.00 | [43–46]<br>Data available for Saxony; average value for pepper and tomato                      |
| <b>Other roots and tubers</b> | Futterrübe/Runkelrübe                                                                       | 287.9      | 457.1      | 335.1      | 382.3  | [43–46]                                                                                        |
|                               | Mangold, Rote Beete/Rote Rübe                                                               |            |            |            |        | Data available for Saxony                                                                      |
|                               |                                                                                             | 287.9      | 457.1      | 335.1      | 382.3  |                                                                                                |
| <b>Other cereals</b>          | Winter-Dinkel                                                                               | 81.20      | 75.10      | 65.40      | 70.70  |                                                                                                |
|                               | Sommernenggetreide                                                                          | 33.30      | 39.20      | 24.80      | 25.60  |                                                                                                |

Table S2: Overview of management data (area shares) per crop group from 2016-2019 (for sources please refer to the descriptions in text).

| Crop group             | Average %<br>of total area | Area with<br>reduced tillage |        | Area with organic<br>manure |       | Area with<br>mineral<br>fertilizer | Irrigat<br>ed area | Area with crop<br>residues<br>incorporated |
|------------------------|----------------------------|------------------------------|--------|-----------------------------|-------|------------------------------------|--------------------|--------------------------------------------|
|                        |                            | 2016                         | 2018   | liquid                      | solid |                                    |                    |                                            |
| Barley                 | 14.22%                     | 52.0%                        | 52.0%  | 32.9%                       | 10.7% | 71%                                | -                  | 80%                                        |
| Grass and clover       | 2.37%                      | 60.9%                        | 61.9%  | 32.9%                       | 10.7% | 71%                                | -                  | 80%                                        |
| Legumes                | 1.56%                      | 60.9%                        | 61.9%  | 32.9%                       | 10.7% | 71%                                | -                  | 80%                                        |
| Maize                  | 8.60%                      | 60.0%                        | 60.0%  | 32.9%                       | 10.7% | 71%                                | -                  | 70%                                        |
| Oats                   | 0.66%                      | 60.9%                        | 61.9%  | 32.9%                       | 10.7% | 71%                                | -                  | 80%                                        |
| other arable crops     | 0.25%                      | 60.9%                        | 61.9%  | 32.9%                       | 10.7% | 71%                                | 100%               | 70%                                        |
| Other cereals          | 0.36%                      | 60.9%                        | 61.9%  | 32.9%                       | 10.7% | 71%                                | -                  | 80%                                        |
| Other roots and tubers | 0.01%                      | 60.9%                        | 61.9%  | 32.9%                       | 10.7% | 71%                                | -                  | 80%                                        |
| Permanent grassland    | 14.44%                     | 100.0%                       | 100.0% | 32.9%                       | 10.7% | 71%                                | -                  | 80%                                        |
| Potatoes               | 0.39%                      | 60.9%                        | 61.9%  | 32.9%                       | 10.7% | 71%                                | 100%               | 80%                                        |
| Rapeseed               | 14.42%                     | 63.4%                        | 63.4%  | 32.9%                       | 10.7% | 71%                                | -                  | 70%                                        |
| Rye                    | 6.31%                      | 66.7%                        | 66.7%  | 32.9%                       | 10.7% | 71%                                | -                  | 80%                                        |
| Set-aside              | 8.47%                      | 100.0%                       | 100.0% | 0.0%                        | 0.0%  | 0%                                 | -                  | 80%                                        |
| Sugar beets            | 1.70%                      | 50.0%                        | 50.0%  | 32.9%                       | 10.7% | 71%                                | 100%               | 80%                                        |
| Triticale              | 6.88%                      | 60.9%                        | 61.9%  | 32.9%                       | 10.7% | 71%                                | -                  | 80%                                        |
| Wheat                  | 19.37%                     | 51.3%                        | 51.3%  | 32.9%                       | 10.7% | 71%                                | -                  | 80%                                        |

Table S3: Overview of the input data for manure and fertilizer (for sources please refer to descriptions in text).

| Type of fertilizer                      | Name in CCB model           | Amount in dtFM ha <sup>-1</sup> |        |        |        | Area      |
|-----------------------------------------|-----------------------------|---------------------------------|--------|--------|--------|-----------|
| <i>Organic fertilizer</i>               |                             | 2016                            | 2017   | 2018   | 2019   | all years |
| slurry (cattle)                         | cattle slurry 10%dm         | 122.48                          | 120.26 | 121.13 | 118.58 | 32.9%     |
| slurry (pig)                            | slurry(pig)                 | 75.06                           | 74.32  | 80.82  | 74.34  | 32.9%     |
| liquid manure<br>(cattle, pigs)         | liquid manure               | 32.11                           | 31.73  | 32.67  | 31.39  | 32.9%     |
| manure (cattle)                         | fresh cattle manure         | 363.35                          | 356.20 | 358.89 | 351.50 | 10.7%     |
| manure (pigs, sheeps,<br>goats, equids) | manure compost              | 248.01                          | 245.21 | 266.05 | 245.21 | 10.7%     |
| manure (chicken)                        | chicken manure (dry)        | 17.00                           | 16.52  | 16.05  | 15.58  | 10.7%     |
| manure (turkey)                         | turkey manure               | 4.76                            | 4.56   | 4.37   | 4.17   | 10.7%     |
| <i>Mineral fertilizer</i>               |                             | 2018, in kgN ha <sup>-1</sup>   |        |        |        |           |
| anorganic N-input<br>on field           | Calcium Ammonium<br>Nitrate |                                 | 19.216 |        |        | 70.6%     |

Table S4: Overview of the development of the parameters in the four scenarios (for sources please refer to descriptions in text).

| AMP                           | Parameter                                                 | BaU                          | trend    | Sc3 (final value) |               | Notes                                                                                                                          |
|-------------------------------|-----------------------------------------------------------|------------------------------|----------|-------------------|---------------|--------------------------------------------------------------------------------------------------------------------------------|
| cultivated crops              | Crop type area                                            | Grass and clover             | 2.2%     | ↑                 | 6.0%          | Grass and clover and Legumes replace maize                                                                                     |
|                               |                                                           | Legumes                      | 2.2%     |                   | 5.8%          |                                                                                                                                |
|                               |                                                           | Maize                        | 9.5%     | ↓                 | 0%            |                                                                                                                                |
|                               |                                                           | Barley                       | 14.9%    | ↓                 | 12.6%         | Each field has marginal strips                                                                                                 |
|                               |                                                           | Oats                         | 0.5%     |                   | 0.4%          |                                                                                                                                |
|                               |                                                           | other arable crops           | 0.1%     |                   | 0.1%          |                                                                                                                                |
|                               |                                                           | other cereals                | 0.1%     |                   | 0.1%          |                                                                                                                                |
|                               |                                                           | other roots and tubers       | 0.0%     |                   | 0.0%          |                                                                                                                                |
|                               |                                                           | permanent grassland          | 14.3%    |                   | 10.3%         |                                                                                                                                |
|                               |                                                           | potatoes                     | 0.2%     |                   | 0.2%          |                                                                                                                                |
|                               |                                                           | rapeseed                     | 15.2%    |                   | 12.9%         |                                                                                                                                |
|                               |                                                           | rye                          | 6.0%     |                   | 5.1%          |                                                                                                                                |
|                               |                                                           | set-aside                    | 7.4%     |                   | 8.1%          |                                                                                                                                |
|                               |                                                           | sugar beets                  | 1.0%     |                   | 0.8%          |                                                                                                                                |
|                               |                                                           | triticale                    | 7.1%     |                   | 6.0%          |                                                                                                                                |
|                               |                                                           | wheat                        | 19.4%    |                   | 16.5%         |                                                                                                                                |
|                               |                                                           | Marginal strips              | 0%       | ↑                 | 15.28%        | Marginal strips are introduced in Sc1; Cultivated with respective shares of barley, oats, other cereals, rye, triticale, wheat |
|                               | Crop yield on marginal strips                             | barley                       | 67.34    | ↓                 | 40.40         | Values from BaU scenario belong to normal fields, marginal strips introduced in Sc1 with same yield amount as in Sc3           |
|                               |                                                           | oats                         | 37.60    |                   | 22.56         |                                                                                                                                |
|                               |                                                           | other cereals                | 72.50    |                   | 43.50         |                                                                                                                                |
|                               |                                                           | rye                          | 52.63    |                   | 31.58         |                                                                                                                                |
|                               |                                                           | triticale                    | 46.90    |                   | 28.14         |                                                                                                                                |
|                               |                                                           | wheat                        | 72.90    |                   | 43.74         |                                                                                                                                |
| Reduced tillage               | Area with reduced tillage                                 | Wheat                        | 51.32%   | ↑                 | 100%          | Gradual change throughout scenarios                                                                                            |
|                               |                                                           | Barley                       | 52.00%   |                   |               |                                                                                                                                |
|                               |                                                           | Rapeseed                     | 63.40%   |                   |               |                                                                                                                                |
|                               |                                                           | Maize                        | 60.00%   |                   |               |                                                                                                                                |
|                               |                                                           | Sugar Beet                   | 66.70%   |                   |               |                                                                                                                                |
|                               |                                                           | Rye                          | 66.70%   |                   |               |                                                                                                                                |
|                               |                                                           | Set-aside                    | 100%     |                   |               |                                                                                                                                |
|                               |                                                           | permanent grassland          | 100%     |                   |               |                                                                                                                                |
|                               |                                                           | marginal strips              | -        |                   |               |                                                                                                                                |
|                               |                                                           | all other                    | 61.39%   |                   |               |                                                                                                                                |
| crop residues and by-products | Area with crop residues left on the field                 | rapeseed, other arable crops | 70%      | ↑                 | 100%          | Gradual change throughout scenarios                                                                                            |
|                               |                                                           | marginal strips              | -        | ↑                 |               | change from Sc1 on                                                                                                             |
|                               |                                                           | all other                    | 80%      | ↑                 |               | Gradual change throughout scenarios                                                                                            |
| fertilizer management         | Area with fertilizer (only for legumes, grass and clover) | org. liquid                  | 32.86%   | ↓                 | 0%            | Gradual change throughout scenarios                                                                                            |
|                               |                                                           | org. solid                   | 10.68%   |                   |               |                                                                                                                                |
|                               |                                                           | mineral                      | 70.60%   |                   |               |                                                                                                                                |
|                               | amount                                                    | Fertilizer type              | In dt/ha | ↓                 | Normal fields | Marginal strips                                                                                                                |

|                                    |        |       |      |
|------------------------------------|--------|-------|------|
| cattle_slurry 10%dm                | 120.61 | 105.5 | 30.2 |
| liquid Manure                      | 31.98  | 28.0  | 6.4  |
| fresh cattle manure                | 357.48 | 312.8 | 89.4 |
| slurry(pig)                        | 76.14  | 66.6  | 19.0 |
| manure compost                     | 251.12 | 219.7 | 62.8 |
| chicken manure (dry)               | 16.29  | 14.3  | 4.1  |
| turkey manure                      | 4.46   | 3.9   | 1.1  |
| mineral (in kgN ha <sup>-1</sup> ) | 19.216 | 16.8  | 4.8  |
